# Supplementary material
Source: PubMed Central journal article supplement (PMC5798899)
Supplement: NIHMS888413-supplement-supplement_1.pdf [file NIHMS888413-supplement-supplement_1.pdf]

## Supplementary Tables

Table S1

*Descriptive Statistics of Rumination Measures by Sex*

| Measure | <i>n</i> | Mean | SD   | Min  | Max  | Skewness <sup>a</sup> | Kurtosis <sup>a</sup> |
|---------|----------|------|------|------|------|-----------------------|-----------------------|
| Males   |          |      |      |      |      |                       |                       |
| RRS-B   | 350      | 1.88 | 0.57 | 1.00 | 4.00 | 0.53                  | 0.13                  |
| RRS-R   | 350      | 1.95 | 0.67 | 1.00 | 4.00 | 0.28                  | -0.82                 |
| RRQ-Ru  | 349      | 2.69 | 0.71 | 1.18 | 4.92 | 0.26                  | -0.17                 |
| ARS-AM  | 350      | 1.58 | 0.52 | 1.00 | 4.00 | 0.32                  | -0.76                 |
| ARS-TR  | 350      | 1.44 | 0.47 | 1.00 | 3.50 | 0.78                  | -0.02                 |
| ARS-AA  | 350      | 1.53 | 0.53 | 1.00 | 3.67 | 0.47                  | -0.81                 |
| ARS-UC  | 349      | 1.78 | 0.53 | 1.00 | 3.50 | -0.07                 | -0.75                 |
| Females |          |      |      |      |      |                       |                       |
| RRS-B   | 400      | 2.05 | 0.64 | 1.00 | 4.00 | 0.52                  | -0.25                 |
| RRS-R   | 401      | 2.13 | 0.70 | 1.00 | 4.00 | 0.33                  | -0.54                 |
| RRQ-Ru  | 400      | 2.93 | 0.76 | 1.00 | 5.00 | 0.33                  | -0.13                 |
| ARS-AM  | 401      | 1.59 | 0.57 | 1.00 | 4.00 | 0.51                  | -0.49                 |
| ARS-TR  | 400      | 1.32 | 0.38 | 1.00 | 3.50 | 1.25                  | 1.85                  |
| ARS-AA  | 400      | 1.54 | 0.56 | 1.00 | 3.83 | 0.65                  | -0.34                 |
| ARS-UC  | 399      | 1.80 | 0.58 | 1.00 | 4.00 | 0.08                  | -0.53                 |

*Note.* min = minimum; max = maximum; RRS-B, Ruminative Responses Scale-Brooding; RRS-R, Ruminative Responses Scale-Reflection; RRQ-Ru, Rumination-Reflection Questionnaire-Rumination; ARS-AM, Anger Rumination Scale- Angry memories; ARS-TR, Anger Rumination Scale-Thoughts of Revenge; ARS-AA, Anger Rumination Scale-Angry Afterthoughts; ARS-UC, Anger Rumination Scale-Understanding Causes.

<sup>a</sup>Skewness and kurtosis reflect the distributions of the log-transformed scores for anger rumination scores only.

## RUMINATION AND PSYCHOPATHOLOGY

Table S2

| Men   | RRQ-RU | RRS-B | RRS-R | AM   | TR   | AA   | UC   | GAD  | MDD  | ASPD | ALC  | TOB  | ILL  | Zero-order |
|-------|--------|-------|-------|------|------|------|------|------|------|------|------|------|------|------------|
| RRS-B | .68*   |       |       |      |      |      |      |      |      |      |      |      |      |            |
| RRS-R | .54*   | .57*  |       |      |      |      |      |      |      |      |      |      |      | Rumi       |
| AM    | .59*   | .59*  | .44*  |      |      |      |      |      |      |      |      |      |      | nation     |
| TR    | .43*   | .42*  | .31*  | .66* |      |      |      |      |      |      |      |      |      | and        |
| AA    | .57*   | .50*  | .39*  | .76* | .71* |      |      |      |      |      |      |      |      | Psych      |
| UC    | .53*   | .51*  | .54*  | .64* | .53* | .69* |      |      |      |      |      |      |      | opath      |
| GAD   | .34*   | .38*  | .41*  | .20* | .06  | .21* | .24* |      |      |      |      |      |      | ology      |
| MDD   | .36*   | .27*  | .28*  | .30* | .05  | .06  | .14  | .31* |      |      |      |      |      |            |
| ASPD  | .14*   | .16*  | .16*  | .19* | .12  | .09  | .14* | .24* | .47* |      |      |      |      |            |
| ALC   | .08    | .10   | .12*  | .17* | .11  | .13* | .13* | .16  | .29* | .57* |      |      |      |            |
| TOB   | .20*   | .28*  | .11   | .26* | .17* | .20* | .19* | .28* | .40* | .53* | .50* |      |      |            |
| CAN   | .19*   | .14*  | .18*  | .14* | .07  | .11  | .19* | .12  | .36* | .56* | .50* | .39* |      |            |
| ILL   | .14    | .08   | .12   | .12  | .10  | .08  | .21* | .35* | .52* | .55* | .57* | .55* | .72* |            |
| Women | RRQ-RU | RRS-B | RRS-R | AM   | TR   | AA   | UC   | GAD  | MDD  | ASPD | ALC  | TOB  | CAN  | Corre      |
| RRS-B | .70*   |       |       |      |      |      |      |      |      |      |      |      |      |            |
| RRS-R | .45*   | .56*  |       |      |      |      |      |      |      |      |      |      |      | lation     |
| AM    | .65*   | .60*  | .36*  |      |      |      |      |      |      |      |      |      |      | s by       |
| TR    | .41*   | .40*  | .21*  | .60* |      |      |      |      |      |      |      |      |      |            |
| AA    | .65*   | .54*  | .32*  | .75* | .62* |      |      |      |      |      |      |      |      |            |
| UC    | .56*   | .51*  | .38*  | .67* | .54* | .71* |      |      |      |      |      |      |      | Sex        |
| GAD   | .41*   | .36*  | .29*  | .25* | .09  | .24* | .21* |      |      |      |      |      |      |            |
| MDD   | .37*   | .36*  | .36*  | .31* | .10  | .27* | .27* | .57* |      |      |      |      |      |            |
| ASPD  | .17*   | .21*  | .18*  | .22* | .25* | .17* | .15* | .29* | .26* |      |      |      |      |            |
| ALC   | .19*   | .21*  | .15*  | .24* | .28* | .22* | .17* | .24* | .26* | .65* |      |      |      |            |
| TOB   | .13*   | .22*  | .05   | .30* | .30* | .25* | .18* | .21* | .15  | .60* | .63* |      |      |            |
| CAN   | .29*   | .27*  | .22*  | .40* | .35* | .30* | .28* | .34* | .25* | .59* | .62* | .63* |      |            |
| ILL   | .23*   | .35*  | .18*  | .33* | .30* | .22* | .21* | .41* | .34* | .72* | .66* | .67* | .64* |            |

*Note.* RRQ-RU = rumination-reflection questionnaire – rumination; RRS-B = ruminative responses scale – brooding; RRS-R = ruminative responses scale – reflection; AM = anger rumination scale – angry memories; TR = anger rumination scale - thoughts of revenge; AA = anger rumination scale - angry afterthoughts; UC = anger rumination scale – understanding causes; ILL = illicit drug use; ALC = alcohol use; GAD = generalized anxiety disorder; MDD = major depressive disorder; ASPD = antisocial personality disorder; TOB = tobacco use. \*  $p < .05$ .
